1 Prescribing patterns for medical treatment of suspected prostatic obstruction: A  
2 spatiotemporal statistical analysis of Scottish open access data

3 **Authors**

4 Federico Andreis, PhD [Faculty of Health Sciences and Sport, University of Stirling]

5 Richard Bryant, BMedSci MBChB FRCSEd(Urol) PHD [Nuffield Department of  
6 Surgical Sciences, University of Oxford, Oxford Cancer Research Centre, Oxford] &  
7 [Department of Urology, Churchill Hospital , Oxford University Hospitals NHS  
8 Foundation Trust]

9 Emanuele Giorgi, PhD [Lancaster Medical School, University of Lancaster]

10 Andrea Williamson, MBChB MPH PhD FRCGP FHEA DTM&H [General Practice and  
11 Primary Care, School of Medicine, Dentistry and Nursing, MVLS, University of  
12 Glasgow] & [General Practitioner Homelessness Health, Medical Officer Addictions,  
13 NHS Glasgow and Clyde, Homeless Health and Resource Services]

14 Ashleigh Ward, PhD [Faculty of Health Sciences and Sport, University of Stirling]

15 **Corresponding author**

16 Federico Andreis, PhD

17 Faculty of Health Sciences and Sport, Pathfoot Building, University of Stirling, FK9  
18 4LA, Stirling

19 email: [federico.andreis@stir.ac.uk](mailto:federico.andreis@stir.ac.uk)

20 tel: +44(0)1786466252

21 **Word count** 3790 (abstract: 277 / text: 3513, excl. figures, tables, equations and  
22 captions)

23 **Abstract**

24 **Background** Healthcare services treating men with prostate conditions are  
25 increasingly burdened worldwide. One of the competing factors in this demand is  
26 increasing diagnosis and treatment of lower urinary tract symptoms in men, much of  
27 which is suspected bladder outflow obstruction secondary to benign prostate  
28 hyperplasia/enlargement. However, the impact of increases on services is largely  
29 hidden, and there is limited knowledge of potential differences in management based  
30 on geography.

31 **Objective** To investigate potential variation in the prescribing of drugs for suspected  
32 bladder outflow obstruction in Scotland based on analysis of publicly available data,  
33 and identify trends that may help to inform future prescribing behaviour.

34 **Design, setting, and participants** We linked the relevant publicly available  
35 prescribing and patient data to all general practices in Scotland between October  
36 2015 and November 2019.

37 **Outcome measurements and statistical analysis** We analysed the numbers of  
38 daily doses of drugs prescribed for suspected bladder outflow obstruction per month  
39 using a Bayesian Poisson regression analysis, incorporating random effects to  
40 account for spatial and temporal elements in prescribing.

41 **Results** Prescriptions of drugs to treat suspected bladder outflow obstruction  
42 increased during the observation period in Scotland, consistent with an ageing  
43 population and increased diagnosis. Whilst some determinants of health inequality  
44 regarding prescribing practices across health boards are consistent with those  
45 known from the literature, other inequalities remain unexplained after accounting for

46 practice- and patient-specific characteristics such as socio-economic deprivation and  
47 rurality.

48 **Conclusions** Variations in spatiotemporal prescribing for suspected bladder outflow  
49 obstruction exist in Scotland, some of which are unexplained and require further  
50 investigation.

51 **Keywords**

52 Suspected bladder outflow obstruction, benign prostate hyperplasia, benign prostate  
53 enlargement, lower urinary tract symptoms, drug prescription, open access data,  
54 spatiotemporal modelling, medical practice

## 55 **Introduction**

56 The incidence of bothersome lower urinary tract symptoms (LUTS) in men, which are  
57 predominantly attributable to benign prostatic hyperplasia (BPH) and/or benign  
58 prostatic enlargement (BPE) causing proven or suspected bladder outflow  
59 obstruction (BOO), is increasing globally [1] resulting in a reduced quality of life and  
60 increased healthcare expenditures [1, 2]. In Scotland as elsewhere in the United  
61 Kingdom and globally, some men may be managed conservatively or medically  
62 using drugs in the primary care setting for suspected or proven BOO (referred  
63 hereafter as BOO), whilst other men may have received investigation in a secondary  
64 care setting, before being recommended to receive medication in primary care. In  
65 Scotland healthcare services treating men with prostate conditions face an  
66 increasing burden from combinations of an ageing population, increased prostate  
67 cancer investigation and incidence [3], and increased awareness of male health  
68 issues. As a result of these combined factors, the impact of bothersome LUTS  
69 arising from BOO on service demand is largely hidden, and studies reporting their  
70 incidence and prevalence are predominantly cross-sectional in nature, with widely  
71 varying results [5].

72 Data regarding the prescription of drugs for the medical management of BOO as a  
73 cause for male bothersome LUTS has been used internationally in recent years to  
74 increase the understanding of patterns of prescribing within specific populations.  
75 This approach can be useful in order to identify potential demographic inequalities in  
76 patient's access to this aspect of healthcare, and to understand the patient  
77 experience, predominantly using longitudinal datasets [6, 7, 8]. However, to date  
78 there is limited understanding of how the prescribing patterns for drugs used to  
79 medically treat BOO may differ both spatially and temporally. The increasing

80 availability of high-quality open access healthcare data in Scotland has created the  
81 opportunity for a more refined and broader-based analysis of prescribing patterns for  
82 BOO. Moreover, Scotland's diverse geography provides an ideal landscape to  
83 understand how factors that may impact on prescribing patterns differ spatially in  
84 terms of geography, as well as longitudinally [9]. We describe a statistical framework  
85 that allows the study of variations in the patterns of drug prescribing in both space  
86 and time, while accounting for numerous relevant socioeconomic and health-related  
87 factors. We have used this approach in order to statistically analyse publicly  
88 available data regarding the prescription of the two main classes of medications  
89 used to treat bothersome LUTS secondary to BOO in Scotland. Using this approach,  
90 we describe spatiotemporal trends that may help inform future urological practice for  
91 this common and ubiquitous condition.

## 92 **Material and Methods**

### 93 Data sources

94 Data was acquired and linked from numerous independent and publicly accessible  
95 sources. The dataset comprised information at the level of individual General  
96 Practices (GPs) and was been created from the following four sources:

- 97 1. NHS Scotland OpenData: drug prescriptions monthly data  
98 (<https://www.opendata.nhs.scot/dataset/prescriptions-in-the-community>)
- 99 2. Information Services Division Scotland (ISD): practice details, deprivation,  
100 rurality (<https://www.isdscotland.org/Health-Topics/General-Practice/>)
- 101 3. National Institute for Health and Care Excellence (NICE): daily dosages  
102 (<https://www.nice.org.uk>)
- 103 4. National Records of Scotland (NRS): postcodes, health boards  
104 ([https://www.nrscotland.gov.uk/statistics-and-data/geography/our-](https://www.nrscotland.gov.uk/statistics-and-data/geography/our-products/scottish-postcode-directory/2018-2)  
105 [products/scottish-postcode-directory/2018-2](https://www.nrscotland.gov.uk/statistics-and-data/geography/our-products/scottish-postcode-directory/2018-2))

106 The keys used to link the sources were the unique GP code and date. The ISD and  
107 NRS portals provided information regarding both the medical practice (i.e. GP) and  
108 their patient population. Table 1 contains a list of the variables extracted from these  
109 sources. We used both socio-economic deprivation and rurality to account for socio-  
110 demographic status. In particular, we used the 2016 Scottish Index of Multiple  
111 Deprivation (SIMD) [10] and a recoded version of the 2018 Scottish Government  
112 Urban Rural Classification [11]. Additionally, the ISD and NRS sources provided GP-  
113 level information regarding the size of the individual practice patient list, the gender  
114 and age distribution, and the location of the practice (based on postcode and name  
115 of relevant Health Board). It is important to note that digital boundaries of Scottish

116 GP practice catchment areas are not available; as a consequence, the spatial  
117 reference for both the GP practice- and patient-level data is the GP practice address.  
118 All GP practices open for the whole study period (October 2015 to November 2019)  
119 were included in the dataset (903 of 944, 95.7%, practices in Scotland open as of 1<sup>st</sup>  
120 January 2019). The Scottish Open Data portal provided the prescribed amounts of  
121 the drugs of interest per month.

122 **Table 1.** Variables extracted from the four data sources and used as covariates in the statistical  
123 model.

| Variable               | Type                         | Short description                                                                                                                                                    |
|------------------------|------------------------------|----------------------------------------------------------------------------------------------------------------------------------------------------------------------|
| Drug group             | Categorical                  | $\alpha$ -1 blocker or 5- $\alpha$ reductase inhibitor                                                                                                               |
| GP patient list size   | Numerical,<br>time-varying   | Number of registered patients per GP practice                                                                                                                        |
| GP practice run        | Categorical,<br>baseline     | Is the practice run by GPs (contract type 17J and 17C), rather than by the NHS (contract type 2C)?<br>Yes/No                                                         |
| Dispensing GP practice | Categorical,<br>baseline     | Does the GP practice have a license to dispense medicines? Yes/No                                                                                                    |
| Males 45p              | Numerical,<br>time-varying   | Proportion of patients that are males aged $\geq$ 45 years                                                                                                           |
| Deprived 15            | Numerical,<br>time-varying   | Proportion of patients under the 15 <sup>th</sup> national percentile of deprivation (SIMD)                                                                          |
| Remote                 | Categorical,<br>time-varying | Modal rurality index among the patients (Scottish Government 8-fold Urban Rural Classification) recoded as remote (4, 5, 7, 8) or non-remote (1, 2, 3, 6).<br>Yes/No |
| Postcode               | Categorical,<br>baseline     | GP practice postcode as of 2019                                                                                                                                      |
| Health board           | Categorical,<br>baseline     | Name of Scottish Health Board where the GP practice is situated.                                                                                                     |

124

### 125 BOO medications analysed

126 We specifically focussed on the prescribing of  $\alpha$ -1 blocking drugs and 5- $\alpha$  reductase  
127 inhibitors as these are the only specific medications used for BOO.  $\alpha$ -1 blockers are  
128 the first-line and most commonly used drugs prescribed for LUTS secondary to BOO  
129 [1, 12], whilst 5- $\alpha$  reductase inhibitors are generally recommended where men are  
130 considered at high risk of BPH progression due to a significantly enlarged prostate,  
131 either as monotherapy or in combination with  $\alpha$ -1 blockers [1, 12, 13]. The  $\alpha$ -1  
132 blockers alfuzosin and tamsulosin hydrochloride were included in the study, however  
133 doxazosin and terazosin were not included as the amounts of these drugs prescribed

134 were negligible, whilst doxazosin may be prescribed for hypertension. The 5- $\alpha$   
135 reductase inhibitors dutasteride and finasteride were both included in this study.  
136 When combined with the suggested daily dosages from the NICE website (see Table  
137 2), a proxy for the number of daily doses was constructed by rounding to the nearest  
138 integer the following expression:

$$n_{dti} = \frac{\text{\#tablets of drug } d \text{ prescribed during month } t \text{ at practice } i}{\text{daily suggested dosage for drug } j} \#(1)$$

139 where  $i$ ,  $d$ , and  $t$  represent the GP practice, drug, and month respectively. In our  
140 dataset, we have observations for  $i = 1, \dots, 903$  GP practices over  $t = 1, \dots, 50$   
141 months;  $d$  indexes the drugs reported in Table 2. The number of daily doses for each  
142 of the drug groups was then constructed by summation of the respective drugs'  
143 monthly amounts of daily doses. We denote with  $n_{jti}$  the number of daily doses of  
144 drugs belonging to group  $j \in \{\alpha 1 - \text{blocker}, 5 - \alpha \text{ reductase inhibitor}\}$ , prescribed  
145 during month  $t$ , at each GP practice  $i$ .

146 **Table 2.** Suggested daily dosages of the study  $\alpha$ -1 blockers and 5- $\alpha$  reductase inhibitors according to  
147 NICE guidelines.

| Drug               | Drug group                      | Suggested daily dosage (NICE) |
|--------------------|---------------------------------|-------------------------------|
| Alfuzosin          | $\alpha$ -1 blocker             | 2.5 mg 3 times a day          |
| Tamsulosin cap/tab | $\alpha$ -1 blocker             | 10 mg once daily              |
| Dutasteride        | 5- $\alpha$ reductase inhibitor | 400mcg once daily             |
| Finasteride        | 5- $\alpha$ reductase inhibitor | 500mcg once daily             |
|                    |                                 | 5mg once daily                |

148

149 We then used a Poisson model in order to describe the average number of daily  
150 doses of BOO medication prescribed each month, accounting for each of the  
151 covariates presented in Table 1, with additional spatial and temporal random effects.  
152 Possible interactions between the prescribing pattern of individual GP practices, or  
153 their geographical location, with the prescribed drug type were also investigated.



154 Equation 1 describes the model's functional form, while Table 3 summarises our  
155 choices in terms of spatial and temporal structure. Further details of the statistical  
156 analysis are provided as supplementary material.

$$n_{jti} \sim \text{Poisson}(\lambda_{jti})$$

$$\log(\lambda_{jti}) = \alpha + \alpha_{[i]} + \alpha_{[ji]} + \alpha_{[tji]} + \beta_1 \log(\text{list size}_{ti}) + \beta_2 \text{drug group} + \beta_3 \text{contract}_i + \\ \beta_4 \text{dispensing}_i + \beta_5 \text{males 45p}_{ti} + \beta_6 \text{deprived 15}_{ti} + \beta_7 \text{remote}_{ti} \# (2)$$

157 where  $j$  (drug group),  $t$  (month), and  $i$  (each GP practice) are as described, and  
158  $\alpha_{[i]}, \alpha_{[ji]}, \alpha_{[tji]}$  denote the random effects, summarised in Table 3. A detailed  
159 discussion of the choice of the random components of the model is available in the  
160 technical supplement.

161 **Table 3.** Spatial and temporal random effects.

| Parameter        | Type         | Short description                                                        |
|------------------|--------------|--------------------------------------------------------------------------|
| $\alpha_{[i]}$   | Spatial      | intrinsic Conditional Auto Regressive (iCAR)                             |
| $\alpha_{[ji]}$  | Unstructured | Unstructured interaction between GP and drug type                        |
| $\alpha_{[tji]}$ | Temporal     | First-order Auto Regressive (AR1), grouped by health board and drug type |

162

### 163 Computational analysis

164 All computational analyses were carried out in R 3.6.1 [14]. We estimated the model  
165 parameters within the Integrated Nested Laplace Approximation framework using the  
166 inla package [15].

167 **Results:**

168 We investigated the effects of each the available covariates (including GP patient list  
 169 size; BOO drug group; whether the practice was GP run; whether the GP practice  
 170 dispensed medication; proportion of males aged 45 years; higher proportion of socio-  
 171 economic deprivation; and remote/rural location) on the study outcome. Table 4  
 172 summarises the output of the Poisson regression estimates of each of the  
 173 associated parameters. In a further analysis, we interpreted each of these  
 174 parameters in terms of relative differences from the model average (with the  
 175 exception of GP practice list size).

176 **Table 4.** Summary of estimated posterior distributions for fixed effects. This summarises the model  
 177 estimates of the fixed effect, and the uncertainty surrounding the estimates.

|                                                           | Mean   | SD     | 2.5%   | 50%    | 97.5%  | Mode   |
|-----------------------------------------------------------|--------|--------|--------|--------|--------|--------|
| $\alpha$ – Intercept                                      | -1.570 | 0.040  | -1.648 | -1.570 | -1.492 | -1.570 |
| $\beta_1$ – log(GP patient list size)                     | 0.915  | 0.002  | 0.911  | 0.915  | 0.919  | 0.915  |
| $\beta_2$ – Drug group (5- $\alpha$ reductase inhibitors) | -0.625 | 0.017  | -0.658 | -0.625 | -0.591 | -0.625 |
| $\beta_3$ – GP run practices                              | 0.238  | 0.033  | 0.174  | 0.238  | 0.302  | 0.238  |
| $\beta_4$ – Dispensing GP practice                        | -0.086 | 0.026  | -0.138 | -0.086 | -0.035 | -0.086 |
| $\beta_5$ – Males aged $\geq 45$ years                    | 4.816  | 0.032  | 4.754  | 4.816  | 4.879  | 4.816  |
| $\beta_6$ – Socially deprived area                        | 0.017  | 0.007  | 0.003  | 0.017  | 0.030  | 0.017  |
| $\beta_7$ – Remote/rural GP practice                      | 0.002  | >0.001 | 0.002  | 0.002  | 0.003  | 0.002  |

178

179 The GP practice patient list size was observed to have an effect consistent with an  
 180 estimated increase of slightly less than one daily dose per month per additional  
 181 patient (point estimate 0.915). As expected, the prescribed doses of the 5 –  
 182  $\alpha$  reductase inhibitor drug group were observed to be on average less than the

183 prescribed doses of the  $\alpha - 1$  blocker drug group. The estimated relative difference  
184 was calculated to be on average 45-48% fewer 5 -  $\alpha$  reductase inhibitor drug  
185 prescriptions than  $\alpha - 1$  blocker drug prescriptions per month (point estimate 46%).

186 We observed that the nature of how the GP practices are individually run are  
187 associated with BOO drug-prescribing practice, with GP-run practices (rather than by  
188 direct Health Board-run practices) having larger volumes of these prescriptions. The  
189 model results are consistent with a 19-35% (point estimate 27%) increased number  
190 of monthly prescriptions for GP-run practices compared with Health Board-run  
191 practices, all else being equal. This is an interesting result, and to the best of our  
192 knowledge no rigorous research has been undertaken to investigate the role that  
193 how a GP practice is managed plays on the stability of GP provision of care and, in  
194 turn, on patient help seeking behaviours and clinical outcomes. Conversely, we  
195 observed that the small number of GP practices who run their own dispensary are  
196 associated with 3-13% (point estimate 8%) lower volumes of BOO drug  
197 prescriptions, compared to GP practices who do not, keeping all other variables  
198 constant. Practices that dispense tend to do so because there is no local community  
199 pharmacy, and one is needed for patient care. It is plausible that having a  
200 dispensing licence may reflect an aspect of remoteness that is not captured by the  
201 rurality measure we employ. We found the proportion of males aged  $\geq 45$  years in the  
202 GP practice patient list to be positively associated with the volume of BOO  
203 prescriptions, with an estimated average increase of 4.9% monthly prescriptions per  
204 percentage point. In contrast, the levels of socio-economic deprivation, and a  
205 remote/rural geographical location of each GP practice, were found to have a  
206 negligible association with prescribing practice.

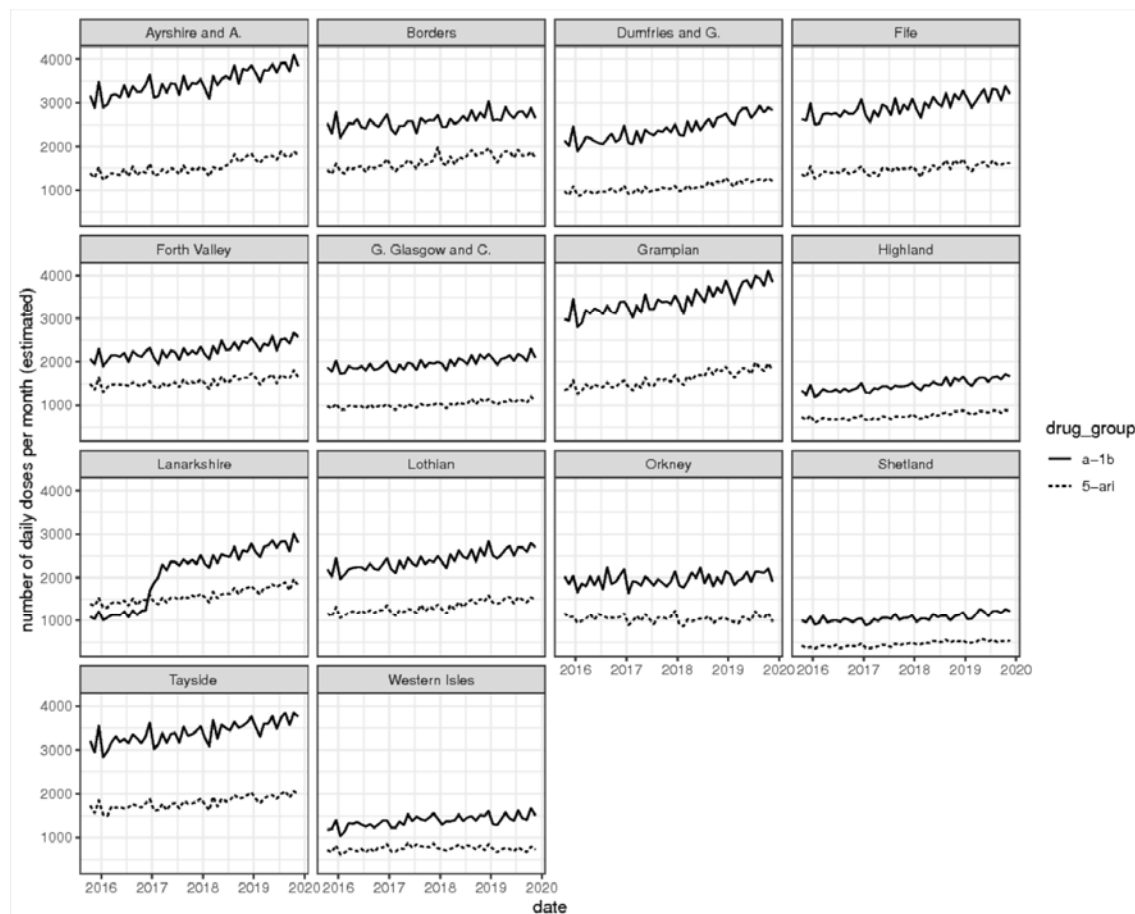

208 **Figure 1:** Statistical model average number of daily doses of each BOO drug type prescribed per  
209 month, by individual Scottish Health Board and adjusted for GP practice patient roll size.

210 Next, we investigated the statistical model's interpolations according to Health Board  
211 and drug group ( $\alpha$ -1 blocking drugs and 5- $\alpha$  reductase inhibitors) (**Figure 1**). This  
212 analysis highlighted a general increase in the volumes of prescriptions for these  
213 medications over the 4-year study period. Trends in prescribing were observed to be  
214 broadly similar across most Health Boards, with a less prominent increase in less  
215 populated areas, which may potentially be attributable to a more stable population  
216 structure over the 4-year period of observation, as well as unaccounted for  
217 differences in help seeking behaviours. Within most Health Boards the growth in  
218 prescriptions for each drug group were almost parallel during the four-year

219 observation period, suggesting consistency in terms of increased BOO drug  
220 prescribing. Additional observations included a marked shift in volumes of  $\alpha$ -1  
221 blocking drug prescriptions in Lanarkshire between November 2016 and February  
222 2017, however no further specific information regarding this phenomenon was  
223 available within the publicly available dataset. In the absence of a reasonable  
224 explanation for this singular observation in this one Health Board, this has been  
225 treated as an artefact due to a change in data-recording.

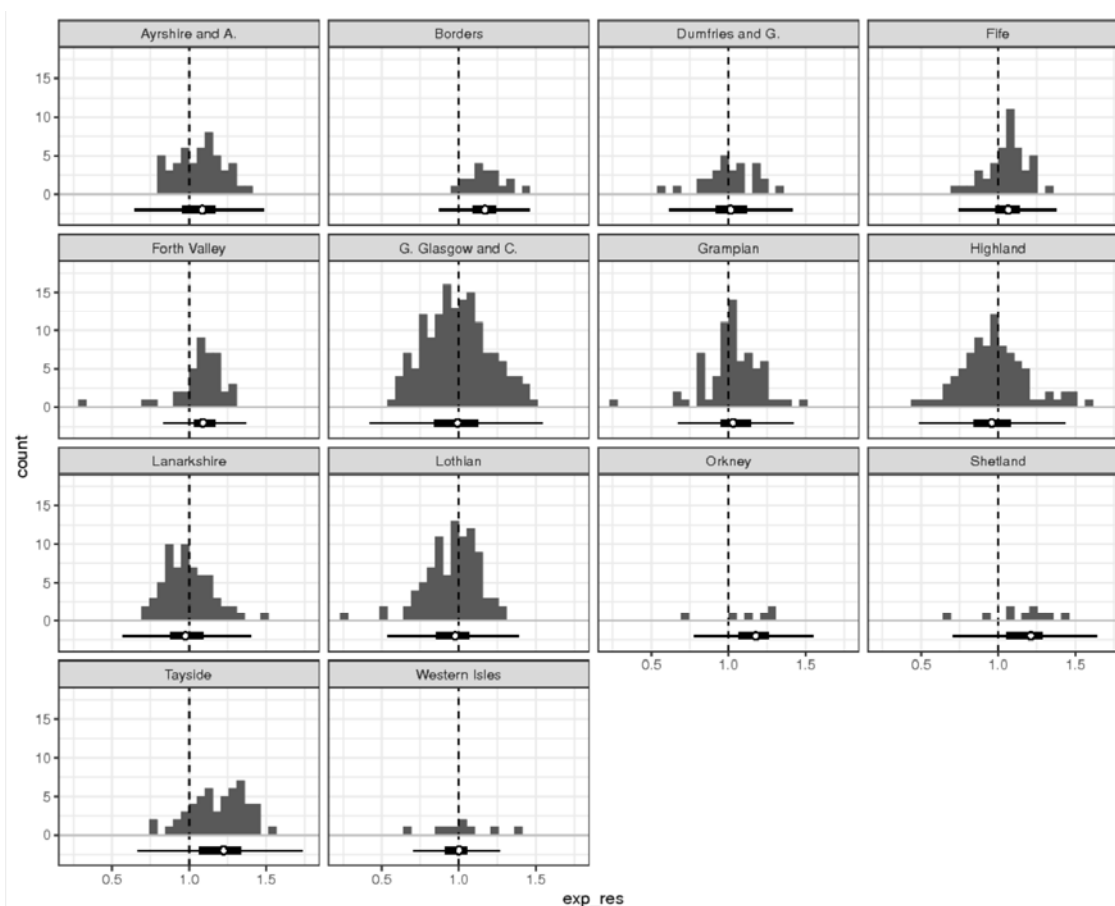

226

227 Figure 2: Frequency histograms of the statistical model's exponentiated residuals for each Scottish  
228 Health Board. The vertical dashed line represents the null residual (value=1 on the exponentiated  
229 scale), and each small black square represents the average number of daily prescriptions of BOO  
230 drugs (combined  $\alpha$  – 1 blockers and 5 –  $\alpha$  reductase inhibitors) per month per individual anonymous  
231 GP practice within each Health Board. The boxplot below each histogram illustrates the same data

232 distribution (the white point marks the median, the thick line represents the usual box, and the thin line  
233 represents the whiskers). Ideally the exponentiated residuals for each GP practice would lie around  
234 the null residual (i.e. value=1), however the heterogeneity in prescribing practice is illustrated by  
235 increased spread to the left and right of the null residual. A shift of GP practice distributions to the  
236 right of the null residual, as seen in Health Boards such as Borders, Fife, Orkney, Shetland and  
237 Tayside, illustrates less prescribing of these medications than would be expected.

238 Next, we investigated how the statistical model residuals may provide insight into  
239 how BOO drug prescribing behaviour differed across Scotland during the 4-year  
240 study period. **Figure 2** illustrates histograms of exponentiated residuals for each  
241 individual Health Board across Scotland, where a reference value of  $1 = e^0$   
242 represents a null residual (i.e. there is no deviation from the model's predicted  
243 average). Each residual is specific to one individual anonymous GP practice. On an  
244 exponential scale, a value of 1 indicates a prescribing behaviour in line with the  
245 average as described by the statistical model across Scotland during the study  
246 period. A value below 1 indicates prescribing volumes higher than expected based  
247 on the model, whilst a value larger than 1 indicates prescribing volumes lower than  
248 expected. Asymmetry around the reference value of 1, and/or multiple modes of  
249 distribution, suggests a different behaviour of individual GP practices within a Health  
250 Board compared against the national average across Scotland.

251 Using this statistical approach, we generally observed consistency in the prescription  
252 of drugs for BOO across Health Boards in Scotland, with most distributions  
253 appearing to be approximately unimodal and symmetric around the null residual (i.e.  
254 the reference value of  $1 = e^0$ ). However, some interesting patterns of prescribing can  
255 be observed, such as the reduced level of BOO drug prescribing in some individual  
256 Health Boards (most notably Borders, Forth Valley, Tayside, Orkney and Shetland)  
257 compared to the average prescribing rate across Scotland. The reasons for these

258 differences in prescribing pattern in these individual Health Boards are unclear and  
259 require further investigation.

260 Next, we examined the BOO drug prescribing patterns of GP practices with the aim  
261 of assessing and visualising possible spatial patterns. Once again using the model  
262 residuals, it was possible to identify individual anonymous practices at the extremes  
263 of the BOO prescribing distribution, and show their Health Board location on a map.  
264 This approach can be useful in order to detect geographic clusters of similar  
265 prescribing patterns, while accounting for temporal trends and other potential  
266 confounding factors that are already included in the model. For example, the  
267 policymaker might be interested in identifying clusters of GP practices where the  
268 rates of prescribing are either very low or very high with respect to the national  
269 average. We present the results of such analysis in **Figure 3** where, to preserve  
270 anonymity of the individual practices, we have aggregated the information at the  
271 Health Board level. We denote those GP practices with a model residual below the  
272 2.5% percentile of the overall distribution of residuals as “high-volumes prescribers”,  
273 and those above the 97.5% percentile as “low-volumes prescribers”. We stress that  
274 high- and low- are with respect to the national average as described by the model  
275 Moreover, the quantile thresholds are arbitrary and can be adjusted according to the  
276 analytical need.

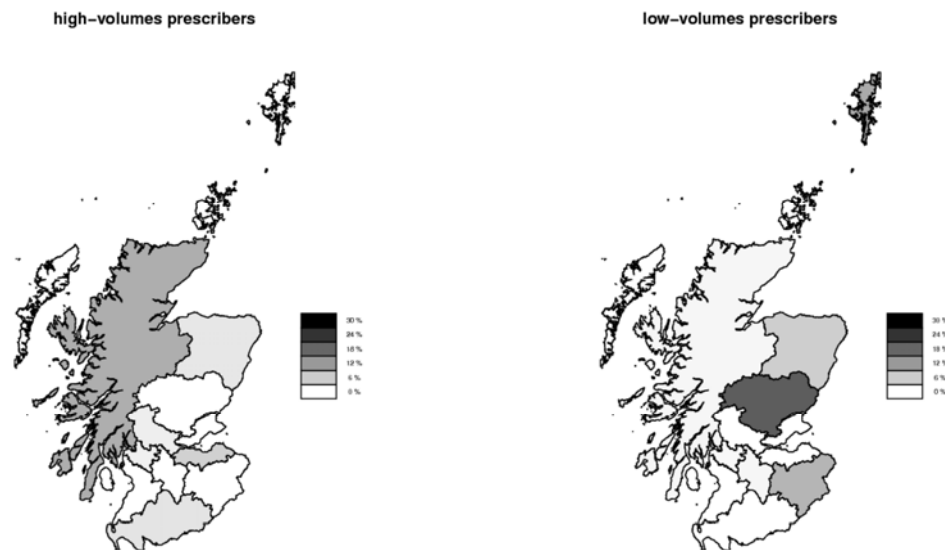

277

278 Figure 3: Maps of Scotland highlighting the Health Board locations of anonymous GP practices at the  
279 extremes of the distribution of BOO drug prescribing. The left panel shows the percentage of GP  
280 practices within each Health Board that have been identified (via model residuals) as being high in  
281 prescribing volumes with respect to the national average (i.e. model residuals <2.5% percentile).  
282 Similarly, the right panel shows the percentage of GP practices low in prescribing volumes with  
283 respect to the national average (i.e. model residuals >97.5% percentile).

284 We observed that Highland is the Health Board with the largest percentage (~9.5%)  
285 of GP practices that were identified as being in the upper tail of prescribing volumes  
286 (identified by model residuals <2.5% percentile), followed by Lothian (~5.3%),  
287 Dumfries and Galloway (~3.2%), Grampian (~2.9%), Forth Valley (~2%) and Greater  
288 Glasgow and Clyde (~1.7%). No high-volume prescribing GP practices were found  
289 within the remaining Health Boards. On the other hand, Tayside was identified as the  
290 Health Board with the largest percentage (~19%) of low-volume prescribers  
291 (identified by model residuals >97.5% percentile). Shetland (10%), Borders (~8.7%),  
292 Grampian (~5.7%), Highland (~1.1%), Lothian (~1%), and Greater Glasgow and  
293 Clyde (~0.9%) also contained GP practices that prescribed far below the national



294 average. The remaining Health Boards did not contain any low-volume prescribing  
295 practices. The underlying reasons for these observations are currently unclear and  
296 require further investigation.

## 297 **Discussion**

298 This study has investigated patterns of medical prescribing for the two most common  
299 classes of drug (i.e.  $\alpha$  – 1 blockers and 5 –  $\alpha$  reductase inhibitors) used to treat BOO  
300 in Scotland over a recent 4-year period (October 2015 - November 2019) using  
301 publicly available data from individual GP practices across all Health Boards. Using  
302 this approach we generated a study dataset by linking prescribing data to GP  
303 practice-specific information (such as their type of contract with NHS, and their  
304 licence to dispense) and summary characteristics of their patient populations (such  
305 as patient age, and GP practice-associated levels of socio-economic deprivation and  
306 rurality). This has enabled us to develop an improved understanding of patterns of  
307 prescribing of these medications across Scotland, and identify where prescription  
308 volumes may vary, having accounted for these variables.

309 A trend of increased BOO drug prescribing practice was observed throughout the 4-  
310 year observation window consistent with an ageing Scottish population, and perhaps  
311 also due to an increased awareness of male health issues amongst both patients  
312 and general practice teams, and increased referral of men to secondary care due to  
313 a raised PSA, which may indicate BPH as well as possible prostate cancer [16, 17].  
314 However, it would be interesting to understand more fully the reasons behind the  
315 observed increase in prescribing across all Scottish Health Boards, and the role that  
316 increased awareness and patient help seeking behaviour may play in this  
317 phenomenon. It may also be interesting to identify the relative contribution (or  
318 otherwise) made by increased referral to secondary care with suspected prostate  
319 cancer (as identified by a raised PSA), which might result in increased BOO/BPH  
320 prescribing as a secondary consequence of a raised PSA referral. A further  
321 possibility may be that an increased focus on cancer management, rather than BPH

322 surgery, may lead to an increase in medical drug use for BOO, rather than definitive  
323 intervention – this is speculative, but would be very interesting to investigate in future  
324 studies, particularly in order to investigate how this may vary geographically.

325 Although it has been acknowledged that aspects regarding individual GP medical  
326 practices may potentially contribute to prostate health inequalities [18, 19], to our  
327 knowledge this is the first time that the particular characteristics of a GP practice  
328 (such as patient ages, GP-run practices, dispensing ability, socio-economic  
329 deprivation levels, and rurality) have been identified as being potential factors  
330 influencing BOO drug prescribing patterns. It was interesting to observe that whether  
331 a practice was Health Board or GP-run, and whether a dispensing pharmacy was  
332 present within the GP practice, was associated with higher and lower prescribing  
333 volumes respectively. While the individual characteristics of GP medical practices  
334 are known to differ by region [20], research accounting for these factors is relatively  
335 sparse; hence it is unclear why this difference exists.

336 This study has several limitations. Firstly, the available data only exists in the public  
337 domain at an aggregate (i.e. individual GP practice or patient list) level, and further  
338 information would be helpful in order to identify the reasons why prescribing  
339 practices vary at a more granular level (perhaps by associating the prescribing  
340 practice with the presence or absence of a GP with a particular interest in men's  
341 health issues, as an example). Secondly, the use of summary data regarding levels  
342 of socio-economic deprivation and rurality of patients reduces the accuracy with  
343 which one can estimate the shape of their association with outcome, with these  
344 factors likely to be important in terms of access to healthcare and prescribing.  
345 Similarly, not having information about specific GP practice catchment areas made it  
346 necessary to use an adjacency matrix based on postcodes, rather than actual

347 distances, resulting in a sub-optimal method of accounting for underlying spatial  
348 processes; furthermore, future work utilising anonymised individual-level patient data  
349 would also help to increase accuracy. Finally, it would be useful to analyse potential  
350 relationships between BOO drug prescribing patterns and longer-term outcomes  
351 from BOO in terms of clinical progression of this condition, such as need for future  
352 surgical intervention or treatment for BOO complications, such as acute urinary  
353 retention, and how they relate to investigation for suspected cancer or raised PSA.  
354 Such an analysis requires additional hospital data which in future work could be  
355 accessed via established high-quality data linkage systems in the Scottish National  
356 Safehaven.

357 It would also be interesting to understand the relative contribution of patient ageing  
358 to the rate of rise in BOO drugs prescription, and the degree to which other factors  
359 such as help-seeking behaviour and clinician awareness might be contributing to this  
360 rate of rise in prescription volumes. These possibilities require further investigation.

361 Nevertheless, despite these caveats and limitations, the analyses presented herein  
362 have identified interesting BOO medical prescribing trends across Scotland that  
363 require further investigation in future studies.

364 In addition to identifying influences from spatial, temporal, and socioeconomic factors  
365 in regards to volumes of prescription of BOO medications, our analysis suggests that  
366 other sources of variability might account for inequalities in prescribing practice. In  
367 recent decades a considerable amount of research has been undertaken in order to  
368 better understand complex health-related phenomena whose determinants might  
369 transcend socio-demographic factors, and can best be described by a unique  
370 regional culture or a strong 'social patterning' [21, 22]. Although at this stage it is

371 unclear what the remaining hidden determinants of the variations in BOO drug-  
372 prescribing patterns may be, Scotland's cultural diversity as described in the wider  
373 literature may constitute a potential explanation [9]. This warrants further  
374 investigation in future research.

375 It would be interesting for future research to investigate trends and potential  
376 inequalities regarding all prostate-related conditions (both benign and malignant)  
377 over space and time in other settings and geographical locations. In particular, it  
378 would be interesting to investigate whether the trends observed in Scotland may  
379 similarly exist in other regions of the UK and Ireland, and if so, are variations  
380 attributable to common factors such as remoteness/rurality and socio-economic  
381 status. Further research to investigate medical practice phenomena as complex as  
382 prescribing patterns using publicly available data may identify key limitations in  
383 practice, and may inform data collection and data sharing in the future. In addition,  
384 the general nature of the statistical modelling framework we have proposed in this  
385 study may be extended to investigate other kinds of models, covariates, and medical  
386 conditions in a range of future studies.

387 **Conclusions**

388 The volume of prescriptions of drugs for LUTS secondary to BOO has steadily  
389 increased across Scotland during a recent 4-year observation period, which may, at  
390 least in part, be attributable to an ageing population and increased diagnoses.  
391 Prescription volume for these medications is associated with various characteristics  
392 of the GP practice (such as type of contract and presence of a licence to dispense).  
393 However, some inequalities in prescribing across Health Boards in Scotland remain  
394 unexplained after accounting for GP practice- and patient-specific characteristics  
395 such as socio-economic deprivation and rurality, suggesting there may be other  
396 hitherto unknown determinants of BOO drug prescribing practice. Further research is  
397 warranted to understand these differences more fully.

398 **Acknowledgements**

399 The authors would like to acknowledge support and encouragement received by Prof  
400 Alan McNeill (NHS Scotland) and Prostate Scotland at the initial conception of this  
401 project.

402

403 **References**

404 [1] European Association of Urology. EAU guidelines on non-neurogenic male LUTS.  
405 2019.

406 [2] Patel ND, Parsons JK. Epidemiology and etiology of benign prostatic hyperplasia  
407 and bladder outlet obstruction. *Indian J Urol* 2014;30:170—6.

408 [3] Allemani C, Matsuda T, Di Carlo V et al. Global surveillance of trends in cancer  
409 survival 2000-14 (CONCORD-3): Analysis of individual records for 37 513 025  
410 patients diagnosed with one of 18 cancers from 322 population-based registries in  
411 71 countries. *Lancet*. 2018; 391:1023—75.

412 [4] NHS National Services Scotland. Cancer waiting times. NHS National Services  
413 Scotland. 2019.

414 [5] Lee SWH, Chan EMC, Lai YK. The global burden of lower urinary tract symptoms  
415 suggestive of benign prostatic hyperplasia: a systematic review and meta-analysis.  
416 *Sci Rep*. 2017;7(1):7984. doi: 10.1038/s41598-017-06628-8.

417 [6] Bajic P, Montgomery J, Nelson M et al. (2020). 133 comparisons fo BPH  
418 medication prescribing among sexagenarians with Medicare an private insurance. *J*  
419 *Sex Med*. 2020; 17(1):37—38.

- 420 [7] Fu Y, Han S, Wang L, Geo W, Cao X, Wang J. Comparison of characteristics of  
421 benign prostatic hyperplasia (BPH) patients treated with finasteride and alpha  
422 blocker combination therapy verses alpha blocker monotherapy in China: An  
423 analysis of electronic medical record data. *Adv. Ther.* 2018; 35:1191—1198.
- 424 [8] Moon HW, Yang JH, Choi JB, Bae WJ. Prescription pattern of alpha-blockers for  
425 management of lower urinary tract symptoms/benign prostatic hyperplasia. *Sci Rep.*  
426 2018; 8.
- 427 [9] Taulbut M, Walsh D, McCartney G et al. Spatial inequalities in life expectancy  
428 within post-industrial regions of Europe: A cross-sectional observational study. *BMI*  
429 *Open.* 2014; 4.
- 430 [10] Scottish Government. Scottish Index Of Multiple Deprivation. [online] available  
431 at: <http://www.gov.scot/Topics/Statistics/SIMD> [accessed 9 Mar 2020].
- 432 [11] Scottish Government. Scottish Government Urban Rural Classification. [online]  
433 available at:  
434 <https://www2.gov.scot/Topics/Statistics/About/Methodology/UrbanRuralClassification>  
435 [accessed 9 Mar 2020]
- 436 [12] National Institute for Health and Care Excellence. LUTS in men. National  
437 Institute for Health and Care Excellence. 2019.
- 438 [13] McConnell JD, Roehrborn CG, Bautista OM et al. The Long-Term Effect of  
439 Doxazosin, Finasteride, and Combination Therapy on the Clinical Progression of  
440 Benign Prostatic Hyperplasia. *Clinical Trial N Engl J Med.* 2003 Dec 8;349(25):2387-  
441 98. doi: 10.1056/NEJMoa030656.



- 442 [14] R Core Team. R: A language and environment for statistical computing. R  
443 Foundation for Statistical Computing, Vienna, Austria 2019. URL [https://www.R-](https://www.R-project.org/)  
444 [project.org/](https://www.R-project.org/).
- 445 [15] H. Rue, S. Martino, and N. Chopin. Approximate Bayesian inference for latent  
446 Gaussian models using integrated nested Laplace approximations (with discussion).  
447 Journal of the Royal Statistical Society, Series B. 2009; 71(2):319--392.
- 448 [16] National Records of Scotland. Mid-year population estimates Scotland, Mid-  
449 2018. 2019.
- 450 [17] European Association of Urology. EAU guidelines on prostate cancer. 2019.
- 451 [18] Public Health England. Prostate cancer risk management programme: overview.  
452 2016.
- 453 [19] Clements A, Bukach C, Rai T, Shine B, Austoker J, Watson E. What influences  
454 men's decision to have a prostate-specific antigen test? A qualitative study. Family  
455 Practice. 2007; 24.
- 456 [20] Burgess L. Primary Care in Scotland. The Scottish Parliament. 2018.
- 457 [21] Walsh D, McCartney G, Collins C, Taulbut M, Batty GD. History, politics and  
458 vulnerability: explaining excess mortality in Scotland and Glasgow. Public Health.  
459 2017; 151:1—12.
- 460 [22] Cowley J, Kiely J, Collins D. Unravelling the Glasgow effect: The relationship  
461 between accumulative bio-psychosocial stress, stress reactivity and Scotland's  
462 health problems. Prev. Med. Rep. 2016; 4:370-375.
